SUMMER 2019 | VOLUME 17 | NUMBER 3

# Focus

The Journal of Lifelong Learning in Psychiatry

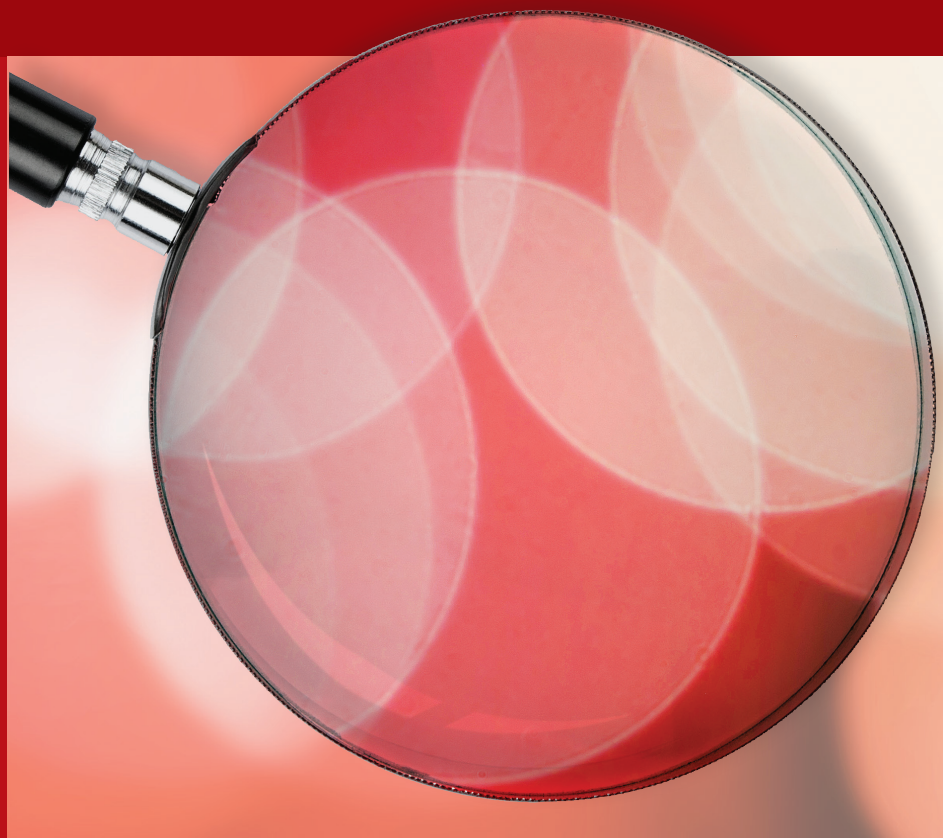

## Evidence-Based Principles for Bipolar Disorder Treatment

Guest Editor: Joseph Goldberg, M.D.

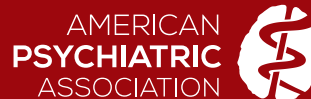

[focus.psychiatryonline.org](http://focus.psychiatryonline.org)
