# First Issue Online Now! “The Opioid Crisis: Filling in the Picture”

*Psychiatric Research and Clinical Practice:*  
An Open-Access Journal From the  
American Psychiatric Association

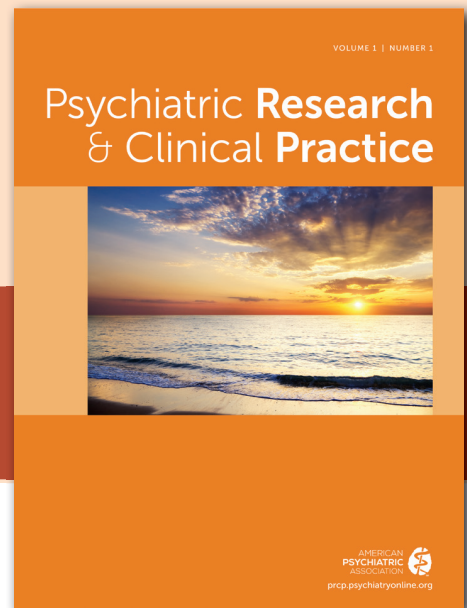

The first issue of *Psychiatric Research and Clinical Practice* (PRCP) focuses on the opioid crisis, covering pharmacological and behavioral treatments of opioid use disorder, general medical and psychiatric comorbidities, and less frequently addressed topics—such as opioid use in Latin America and treatment engagement of pregnant women with opioid use disorder.

PRCP is a peer-reviewed, open-access journal from the American Psychiatric Association that offers a high-profile publishing destination for peer-reviewed submissions that build on the psychiatric knowledge base and bring research findings closer to clinical utility through deeper investigation.

Be a part of the conversation. Submissions are welcome on all aspects of mental and behavioral health to inform the field from bench to bedside. PRCP articles occupy that place between research and clinical utility, leaning toward clinical utility through publication of replication studies and features that show how new scientific knowledge can inform clinical practice.

*Psychiatric Research and Clinical Practice* is committed to keeping the field of psychiatry vibrant and relevant by publishing wide-ranging information on all aspects of mental and behavioral health. Published in accordance with open-access principles, PRCP makes all of its content immediately available for free—the reach one wants from an established and respected publisher.

## About the Editor

**Kimberly A. Yonkers, M.D.**, is Professor of Psychiatry, Epidemiology, Obstetrics/Gynecology, and Reproductive Sciences and Director of the Center for Wellbeing of Women and Mothers at Yale University. She brings to the task of serving as PRCP's Editor a broad and deep experience in research and clinical work. Her research includes investigations into the clinical course, etiopathology, and treatment of psychiatric disorders as they occur in women. A major component of this work includes investigations into the occurrence and treatment of illnesses in pregnancy and the postpartum period and across the menstrual cycle. This area, by its nature, cuts across disciplines and requires psychiatric expertise as well as knowledge in neuroscience and reproductive biology. Her work has also included determining optimal methods for screening and treating women for substance use problems when they are pregnant or postpartum.

AMERICAN  
PSYCHIATRIC  
ASSOCIATION  
PUBLISHING

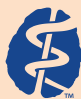

www.appi.org  
1-800-368-5777  
appi@psych.org

[prcp.psychiatryonline.org](http://prcp.psychiatryonline.org)

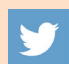

@APAPubPRCP

AH1915
